# Supplementary material for: The Effects of Technological Interventions on Social Participation of Community-Dwelling Older Adults with and without Dementia: A Systematic Review
Source: MDPI journal article supplement (doi:10.3390/jcm10112308), 2021-05-25
Supplement: s1 [file s1]

# Table S1: Data collection form: technological interventions to enhance social participation in dementia

Version 2, February 2021

|                                                                                                                |  |
|----------------------------------------------------------------------------------------------------------------|--|
| Study title                                                                                                    |  |
| Study ID<br><i>(surname of first author and year first full report of study was published e.g. Smith 2010)</i> |  |
| Paper ID<br><i>(from Excel file)</i>                                                                           |  |
| Date form completed<br><i>(dd/mm/yyyy)</i>                                                                     |  |
| Publication type <i>(e.g. full report, paper, conference paper)</i>                                            |  |

**Table S2: General Study Characteristics**

|                                                                                           | Descriptions as stated in report/paper                                                                  | Location in text or source (pg. & ¶/fig/table/other) |
|-------------------------------------------------------------------------------------------|---------------------------------------------------------------------------------------------------------|------------------------------------------------------|
| <b>Aim of study</b> <i>(e.g. efficacy, equivalence, pragmatic)</i>                        |                                                                                                         |                                                      |
| <b>Design of study</b> <i>(please specify how the authors define the design)</i>          |                                                                                                         |                                                      |
| <b>Country of data collection</b> <i>(please specify location and the social setting)</i> |                                                                                                         |                                                      |
| <b>Ethical approval obtained for study</b>                                                | <input type="checkbox"/> Yes <input type="checkbox"/> No <input type="checkbox"/> Unclear/not described |                                                      |

|                                                                                                                                                                  |                                                                                                                                                                                                                                          |  |
|------------------------------------------------------------------------------------------------------------------------------------------------------------------|------------------------------------------------------------------------------------------------------------------------------------------------------------------------------------------------------------------------------------------|--|
| <b>Theoretical concepts related to social participation</b><br><i>(e.g. social connectedness, social isolation, loneliness, ... specify the definition used)</i> |                                                                                                                                                                                                                                          |  |
| <b>Study population</b>                                                                                                                                          | __ Older adults in general (excluding older adults with cognitive impairments)<br>__ Older adults in general (including older adults with cognitive impairments)<br>__ Older adults with cognitive impairments<br>Other,<br>namely _____ |  |
|                                                                                                                                                                  | <b>Participants</b><br>N:<br><i>Mean age:</i><br><i>Age range:</i><br><i>Male:</i><br><i>Female:</i>                                                                                                                                     |  |
|                                                                                                                                                                  | <b>Inclusion/exclusion criteria</b>                                                                                                                                                                                                      |  |
|                                                                                                                                                                  | <b>Withdrawals, exclusions and drop-outs</b> <i>(provide reasons if stated)</i>                                                                                                                                                          |  |

**Table S3: Intervention characteristics**

|                                                                                           | <b>Description as stated in report/paper</b>                                           | <b>Location in text or source</b> ( <i>pg. &amp; ¶/fig/table/other</i> ) |
|-------------------------------------------------------------------------------------------|----------------------------------------------------------------------------------------|--------------------------------------------------------------------------|
| <b>Description of the intervention/ technology</b>                                        | <b>Experimental intervention: (N = )</b><br><br><b>Comparison intervention: (N = )</b> |                                                                          |
| <b>Aim of intervention</b>                                                                |                                                                                        |                                                                          |
| <b>Duration of intervention period</b>                                                    |                                                                                        |                                                                          |
| <b>Timing</b> ( <i>e.g. frequency, duration of each episode</i> )                         |                                                                                        |                                                                          |
| <b>Providers</b> ( <i>e.g. research assistant, health care professional, researcher</i> ) |                                                                                        |                                                                          |
| <b>Setting</b>                                                                            |                                                                                        |                                                                          |
| <b>Theoretical basis of the intervention</b>                                              |                                                                                        |                                                                          |

**Table S4: Outcomes**

*Copy and paste table for each outcome*

|                                                                                                                                           | Description as stated in report/paper                                                                                             | Location in text or source (pg. & ¶/fig/table/other) |
|-------------------------------------------------------------------------------------------------------------------------------------------|-----------------------------------------------------------------------------------------------------------------------------------|------------------------------------------------------|
| <b>Outcome name</b><br><i>(just for quantitative/mixed methods studies)</i>                                                               |                                                                                                                                   |                                                      |
| <b>Outcome definition</b><br><i>(just for quantitative/mixed methods studies)</i>                                                         |                                                                                                                                   |                                                      |
| <b>Time points measured</b> <i>(specify whether from start or end of intervention)</i>                                                    |                                                                                                                                   |                                                      |
| <b>Outcome measures</b><br><i>(please tick and specify the data collection methods)</i>                                                   | <input type="checkbox"/> QUANTITATIVE <input type="checkbox"/> QUALITATIVE <input type="checkbox"/> MIXED METHODS                 |                                                      |
| <b>Scales: upper and lower limits</b><br><i>(indicate whether high or low score is good, just for quantitative/mixed methods studies)</i> |                                                                                                                                   |                                                      |
| <b>Is outcome/tool validated?</b><br><i>(just for quantitative/mixed methods studies)</i>                                                 | <input type="checkbox"/> Yes <input type="checkbox"/> No <input type="checkbox"/> Unclear <input type="checkbox"/> Not applicable |                                                      |

**Table S5: Findings and influencing factors**

|                                                                                                          | <b>Description as stated in report/paper</b> | <b>Location in text or source</b> ( <i>pg. &amp; ¶/fig/table/other</i> ) |
|----------------------------------------------------------------------------------------------------------|----------------------------------------------|--------------------------------------------------------------------------|
| <b>Main findings of the study</b>                                                                        |                                              |                                                                          |
| <b>Factors explaining the success or failure of the intervention in influencing social participation</b> |                                              |                                                                          |

**Table S6: Other information**

|                                                     |  |
|-----------------------------------------------------|--|
| <b>Key conclusions of study authors</b>             |  |
| <b>Correspondence for further study information</b> |  |
| <b>Notes:</b>                                       |  |
